# Supplementary material for: Techno-economic assessment of two-stage hydropyrolysis of lignin for BTX production using iron-based catalysts
Source: Royal Society of Chemistry journal article supplement (doi:10.1039/d4su00652f), 2025-01-01
Supplement: d4su00652f3.pdf [file d4su00652f3.pdf]

Please note that this Supplementary Information file was added on 8 April 2025 and was not available at first publication of the article on 27 January 2025. The Royal Society of Chemistry apologises for this error.

## Supplementary Material 1

Table 1S – ISBL and OSBL Factors

| Factor           | Description                                | Value |
|------------------|--------------------------------------------|-------|
| ISBL Adjustments |                                            |       |
| $f_{er}$         | Erection of equipment                      | 0.4   |
| $f_p$            | Piping                                     | 0.6   |
| $f_i$            | Instruments, sensors and control equipment | 0.3   |
| $f_{el}$         | Electrics                                  | 0.2   |
| $f_c$            | Civil engineering costs                    | 0.3   |
| $f_s$            | Site structures/buildings                  | 0.2   |
| $f_i$            | Insulation, paint and other                | 0.1   |
| OSBL Adjustments |                                            |       |
| OS               | Offsites                                   | 0.4   |
| DE               | Design and Engineering                     | 0.25  |
| X                | Contingency                                | 0.1   |

Table 2S – Utility Costs

| Utility       | Price unit       | Price   |
|---------------|------------------|---------|
| Electricity   | £/kWh            | 0.11    |
| Steam         | £/GJ             | 12.7    |
| Cooling water | £/GJ             | 0.255   |
| Air           | £/m <sup>3</sup> | 0.00252 |

Table 3S – Hydrogen Production Utility Requirements

| Utility           | Unit                | Requirement |
|-------------------|---------------------|-------------|
| Steam for Heating | kJ/g H <sub>2</sub> | 10.7        |
| Cooling Water     | kJ/g H <sub>2</sub> | 22.3        |
| Electricity       | kJ/g H <sub>2</sub> | 6.2         |
